# Supplementary material for: Impact of renal denervation on cardiac remodeling in resistant hypertension: A meta‐analysis
Source: PubMed Central journal article supplement (PMC10823454; doi:10.1002/clc.24222), 2024-01-29
Supplement: CLC-47-e24222-s001.pdf [file CLC-47-e24222-s001.pdf]

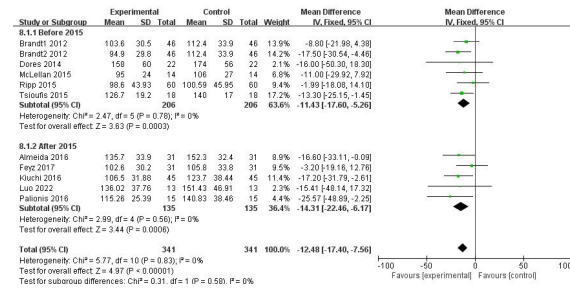

(A)

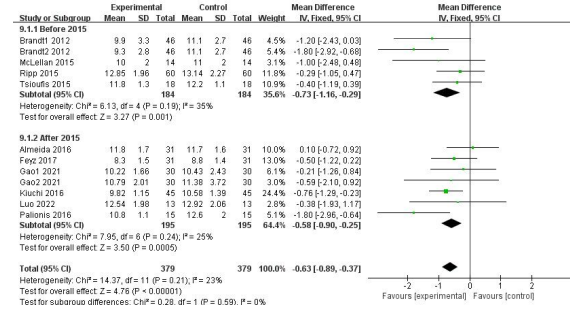

(B)

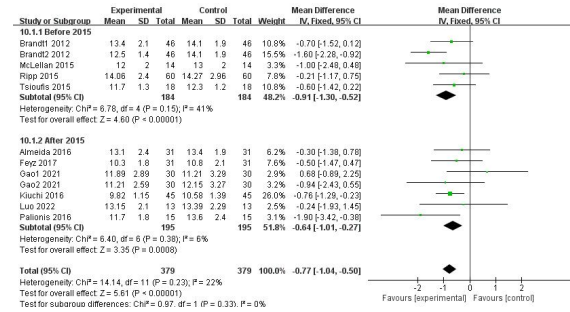

(C)

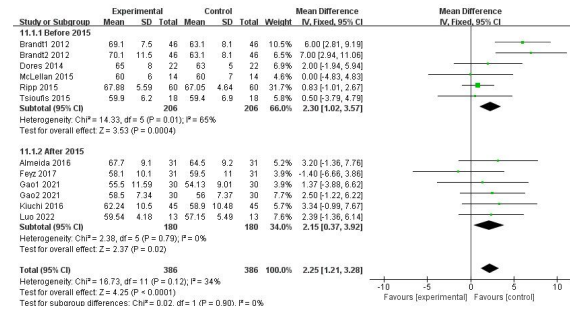

(D)
